# Supplementary material for: Chalcogen composition driven enhancement of catalytic efficiency in zirconium based monolayers: insight from reaction coordinate mapping
Source: Royal Society of Chemistry journal article supplement (doi:10.1039/d3se00632h), 2023-01-01
Supplement: d3se00632h1.pdf [file d3se00632h1.pdf]

# Chalcogen Composition Driven Enhancement of Catalytic Efficiency in Zirconium based Monolayers: Insight from Reaction Coordinate Mapping

May 13, 2023

**Shalini Tomar, and Sudip Chakraborty\***

Material Theory for Energy Scavenging (MATES) Lab, Harish-Chandra  
Research Institute (HRI), Allahabad, HBNI, Chhatnag Road, Jhansi,  
Prayagraj 211019, India.

## 1 d-band center Analysis

The d-band center theory proposed by Nørskov and Hammer is a theoretical model for explaining substance adsorption on catalysts. This theory suggests that the adsorption capacity of a catalyst is mainly influenced by the position of the d-orbital center of the metal atom in the catalyst when a bond is formed with the adsorbed material. It also elucidates the connections between a catalyst's electronic structure and its adsorption capacity, as well as for revealing the catalyst's strong coordination ability and electrocatalytic performance based on changes in energy levels and electronic structures. Additionally, the incorporation of dopants, vacancies, strains, and heterostructures can be used to regulate the d-band centers of the catalyst atoms. In our work, we investigated the d-band center to find out the relation with HER activity. The plots for projected density of states (PDOS) of 'd' orbital of Zr atoms with d-band center are represented in Fig. 3 (a), (b) & (c) for functionalized ZrS<sub>2</sub>, ZrSe<sub>2</sub> and ZrTe<sub>2</sub> monolayers, respectively and the values of d -band center are noted in Tab. 6 in supplementary information. In our analysis, we observed a correlation between the d-band center's proximity to the Fermi level and its efficacy in promoting the HER. Our findings indicate that as the d-band center moves further away from the Fermi level, its catalytic activity decreases. Our research shows a similar trend between the HER activity and the d-band center. In the comparison

of HER activities for the functionalized  $\text{ZrS}_2$  monolayers, P-doped case shows good HER activity as compared to C and N doped cases which also reflected into d-band center as shown in Fig. 3 (a) in the supplementary information. The d-band center for P-doped  $\text{ZrS}_2$  case is nearest to the Fermi level while for the C and N doped  $\text{ZrS}_2$  cases, it shift away from the Fermi level as results they are less active as compared to P-doped. We also observed the similar trend for functionalized  $\text{ZrSe}_2$  and  $\text{ZrTe}_2$  monolayer and the d-band center of P-doped  $\text{ZrSe}_2$  and N-doped  $\text{ZrTe}_2$  are the closest to the Fermi level as shown in Fig 3 (b) and Fig 3 (c) in the supplementary information, respectively and identified as the good HER catalyst.

Figure 1: Side and top views of doped  $\text{ZrSe}_2$  structure: (a), (b) for C doped (C - brown color atom); (c), (d) for N doped (N - light blue color atom); and (e), (f) for P doped (P - purple color atom).

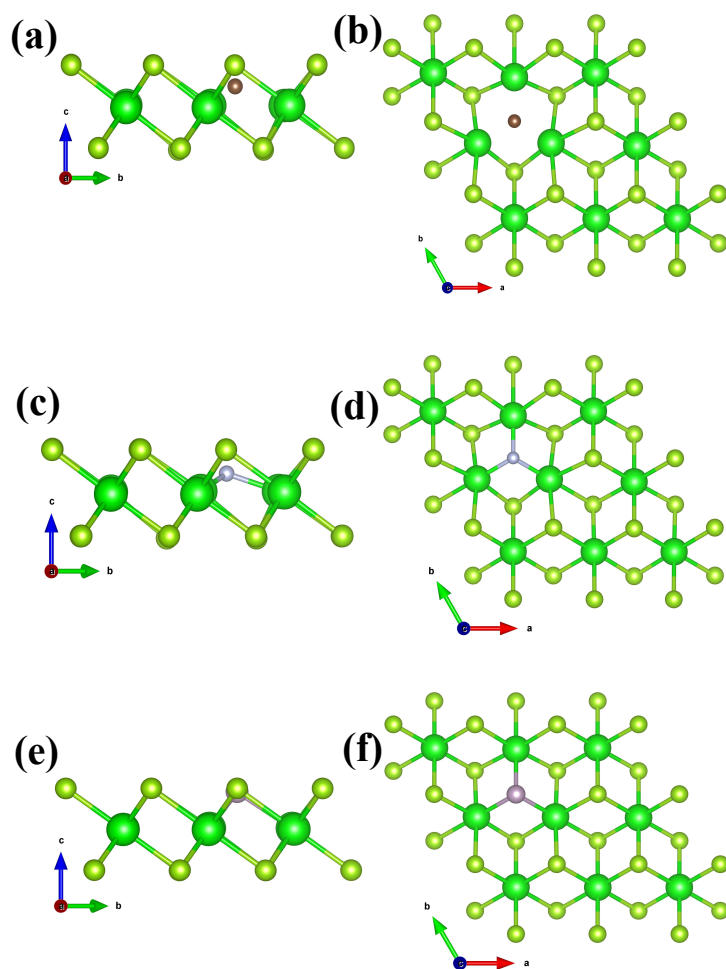

Figure 2: Side and top views of doped  $\text{ZrTe}_2$  structure: (a), (b) for C doped (C - brown color atom); (c), (d) for N doped (N - light blue color atom); and (e), (f) for P doped (P - purple color atom).

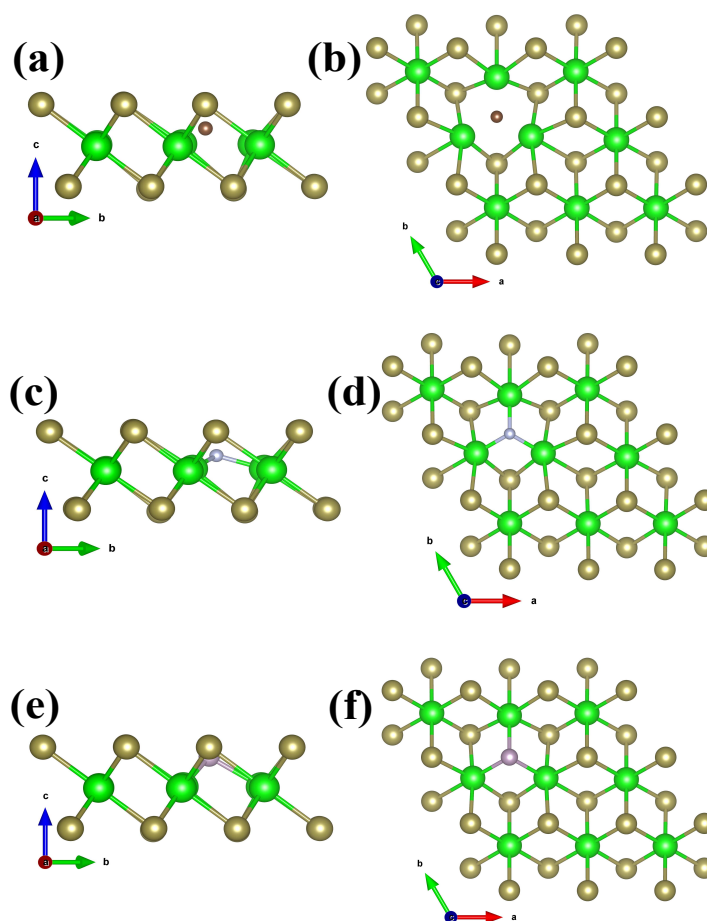

Figure 3: Illustrated the density of states of 'd' orbital of Zr atoms with the d-band center for functionalized cases; (a)  $\text{ZrS}_2$  (b)  $\text{ZrSe}_2$  and (c)  $\text{ZrTe}_2$ . The black dashed line shows the d-band center and gray dotted line represents the Fermi level.

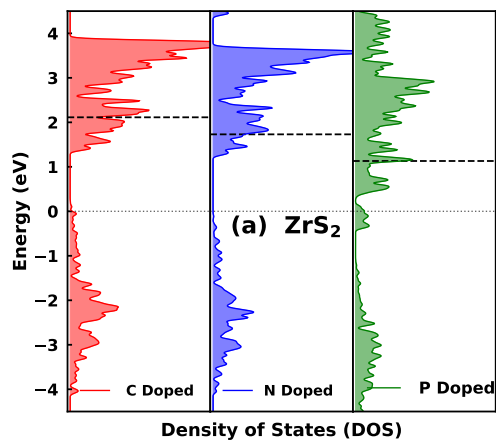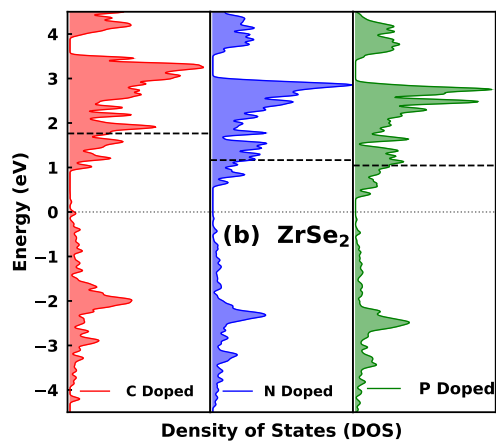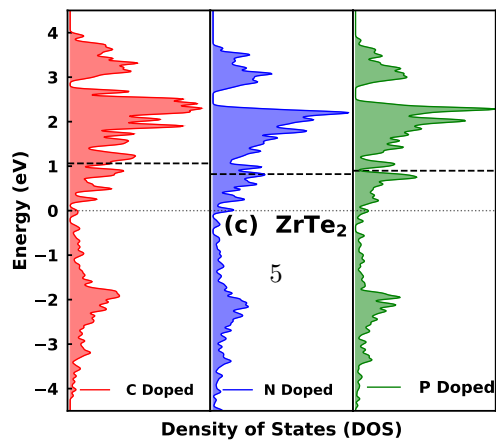

**Table 1: Calculated lattice constants ( $a$ ), bond length ( $D$ ) of Zr and X, distance ( $d$ ) between the Zr and dopant ( $d$ ) for pristine and functionalized (C, N, and P doped)  $ZrX_2$  monolayers.**

| Parameters  | ZrS <sub>2</sub> |       |       |       | ZrSe <sub>2</sub> |       |       |       | ZrTe <sub>2</sub> |       |       |       |
|-------------|------------------|-------|-------|-------|-------------------|-------|-------|-------|-------------------|-------|-------|-------|
|             | Pristine         | C     | N     | P     | Pristine          | C     | N     | P     | Pristine          | C     | N     | P     |
| $a$ (Å)     | 11.04            | 11.04 | 11.04 | 11.04 | 11.38             | 11.38 | 11.38 | 11.38 | 11.90             | 11.90 | 11.90 | 11.90 |
| $D$ (Å)     | 2.55             | 2.58  | 2.57  | 2.53  | 2.70              | 2.72  | 2.70  | 2.69  | 2.92              | 2.92  | 2.91  | 2.91  |
| $d$ (Å)     |                  | 2.21  | 2.22  | 2.62  |                   | 2.18  | 2.21  | 2.64  |                   | 2.17  | 2.20  | 2.63  |
| $\phi$ (eV) | 3.60             | 3.59  | 3.65  | 3.68  | 3.46              | 3.46  | 3.46  | 3.51  | 4.13              | 4.08  | 4.09  | 4.13  |

**Table 2: Adsorption energies and free energies of H\* adsorbed on pristine and functionalized layered ZrX<sub>2</sub> structures along with the optimized surface-adsorbate distances.**

| System                     | Adsorption Site    | $E_H$ [eV] | $\Delta G_H$ [eV] | $d_{surface-H}$ (in Å) |
|----------------------------|--------------------|------------|-------------------|------------------------|
| Pristine ZrS <sub>2</sub>  | Top on S atom      | +0.734     | +0.974            | 1.36                   |
| C doped                    | Top on dopant atom | -1.89      | -1.65             | 1.11                   |
| N doped                    | Top on dopant atom | -1.63      | -1.39             | 1.03                   |
| P doped                    | Top on dopant atom | -1.14      | -0.90             | 1.41                   |
| Pristine ZrSe <sub>2</sub> | Top on Se atom     | +0.871     | +1.111            | 1.48                   |
| C doped                    | Top on dopant atom | -1.70      | -1.46             | 1.11                   |
| N doped                    | Top on dopant atom | -0.962     | -0.722            | 1.03                   |
| P doped                    | Top on dopant atom | -0.749     | -0.50             | 1.41                   |
| Pristine ZrTe <sub>2</sub> | Top on Te atom     | +0.964     | +1.204            | 1.68                   |
| C doped                    | Top on dopant atom | -0.980     | -0.740            | 1.11                   |
| N doped                    | Top on dopant atom | -0.178     | +0.06             | 1.03                   |
| P doped                    | Top on dopant atom | -0.113     | +0.126            | 1.42                   |

**Table 3: Adsorption ( $E_A$ ;  $A = O^*$ ,  $OH^*$ , and  $OOH^*$ ), free energies ( $\Delta G_A$ ) of  $O^*$ ,  $OH^*$ , and  $OOH^*$  and difference of free energy ( $\Delta G_1$  and  $\Delta G_2$ ) of intermediates on functionalized layered  $ZrS_2$  structure. ( $\Delta G_1 = \Delta G_O^* - \Delta G_{OH}^*$  and  $\Delta G_2 = \Delta G_{OOH}^* - \Delta G_O^*$ )**

| System           | Adsorbate | Free energy ( $\Delta G_H$ ) [eV] | $\Delta G_1$ and $\Delta G_2$ [eV] |
|------------------|-----------|-----------------------------------|------------------------------------|
| Pristine $ZrS_2$ | $O^*$     | -0.351                            | $\Delta G_1 = 0.461$               |
|                  | $OH^*$    | -0.812                            | $\Delta G_2 = 0.448$               |
|                  | $OOH^*$   | +0.097                            |                                    |
| C Doped $ZrS_2$  | $O^*$     | -3.871                            | $\Delta G_1 = -0.778$              |
|                  | $OH^*$    | -3.093                            | $\Delta G_2 = 1.835$               |
|                  | $OOH^*$   | -2.036                            |                                    |
| N Doped $ZrS_2$  | $O^*$     | -0.379                            | $\Delta G_1 = -0.159$              |
|                  | $OH^*$    | -0.220                            | $\Delta G_2 = 1.835$               |
|                  | $OOH^*$   | +0.096                            |                                    |
| P Doped $ZrS_2$  | $O^*$     | -2.251                            | $\Delta G_1 = 1.094$               |
|                  | $OH^*$    | -3.345                            | $\Delta G_2 = 0.681$               |
|                  | $OOH^*$   | -1.57                             |                                    |



**Table 4: Adsorption ( $E_A$ ;  $A = O^*$ ,  $OH^*$ , and  $OOH^*$ ), Free energies ( $\Delta G_A$ ) of  $O^*$ ,  $OH^*$ , and  $OOH^*$  and difference of free energy ( $\Delta G_1$  and  $\Delta G_2$ ) of intermediates on functionalized layered  $ZrSe_2$  structure. ( $\Delta G_1 = \Delta G_O^* - \Delta G_{OH}^*$  and  $\Delta G_2 = \Delta G_{OOH}^* - \Delta G_O^*$ )**

| System            | Adsorbate | Free energy ( $\Delta G_H$ ) [eV] | $\Delta G_1$ and $\Delta G_2$ [eV] |
|-------------------|-----------|-----------------------------------|------------------------------------|
| Pristine $ZrSe_2$ | $O^*$     | -0.130                            | $\Delta G_1 = 1.016$               |
|                   | $OH^*$    | -1.146                            | $\Delta G_2 = 0.299$               |
|                   | $OOH^*$   | +0.169                            |                                    |
| C Doped $ZrSe_2$  | $O^*$     | -3.274                            | $\Delta G_1 = 0.006$               |
|                   | $OH^*$    | -3.280                            | $\Delta G_2 = 0.642$               |
|                   | $OOH^*$   | -2.632                            |                                    |
| N Doped $ZrSe_2$  | $O^*$     | 0.375                             | $\Delta G_1 = 0.284$               |
|                   | $OH^*$    | +0.091                            | $\Delta G_2 = -0.408$              |
|                   | $OOH^*$   | -0.033                            |                                    |
| P Doped $ZrSe_2$  | $O^*$     | -2.079                            | $\Delta G_1 = 0.831$               |
|                   | $OH^*$    | -2.910                            | $\Delta G_2 = 0.990$               |
|                   | $OOH^*$   | -1.089                            |                                    |

**Table 5: Adsorption ( $E_A$ ;  $A = \text{O}^*$ ,  $\text{OH}^*$ , and  $\text{OOH}^*$ ), Free energies ( $\Delta G_A$ ) of  $\text{O}^*$ ,  $\text{OH}^*$ , and  $\text{OOH}^*$  and difference of free energy ( $\Delta G_1$  and  $\Delta G_2$ ) of intermediates on functionalized layered  $\text{ZrTe}_2$  structure. ( $\Delta G_1 = \Delta G_{\text{O}^*}^* - \Delta G_{\text{OH}^*}^*$  and  $\Delta G_2 = \Delta G_{\text{OOH}^*}^* - \Delta G_{\text{O}^*}^*$ )**

| System                   | Adsorbate      | Free energy ( $\Delta G_H$ ) [eV] | $\Delta G_1$ and $\Delta G_2$ [eV] |
|--------------------------|----------------|-----------------------------------|------------------------------------|
| Pristine $\text{ZrTe}_2$ | $\text{O}^*$   | -0.595                            | $\Delta G_1 = 0.580$               |
|                          | $\text{OH}^*$  | -1.175                            | $\Delta G_2 = 0.856$               |
|                          | $\text{OOH}^*$ | +0.261                            |                                    |
| C Doped $\text{ZrTe}_2$  | $\text{O}^*$   | -2.190                            | $\Delta G_1 = 0.208$               |
|                          | $\text{OH}^*$  | -2.398                            | $\Delta G_2 = 1.006$               |
|                          | $\text{OOH}^*$ | -1.184                            |                                    |
| N Doped $\text{ZrTe}_2$  | $\text{O}^*$   | -0.303                            | $\Delta G_1 = 1.848$               |
|                          | $\text{OH}^*$  | -2.151                            | $\Delta G_2 = -0.293$              |
|                          | $\text{OOH}^*$ | -0.596                            |                                    |
| P Doped $\text{ZrTe}_2$  | $\text{O}^*$   | -1.954                            | $\Delta G_1 = 0.305$               |
|                          | $\text{OH}^*$  | -2.259                            | $\Delta G_2 = 0.676$               |
|                          | $\text{OOH}^*$ | -1.278                            |                                    |

**Table 6:** The values of d-band center (reference taken as the Fermi level at zero.) for 'd' orbital of Zr atoms in the non-metal (C, N and P) doped ZrS<sub>2</sub>, ZrSe<sub>2</sub>, and ZrTe<sub>2</sub> monolayers.

| Parameter     | ZrS <sub>2</sub> |          |          | ZrSe <sub>2</sub> |          |          | ZrTe <sub>2</sub> |          |          |
|---------------|------------------|----------|----------|-------------------|----------|----------|-------------------|----------|----------|
|               | C                | N        | P        | C                 | N        | P        | C                 | N        | P        |
| d-band center | 2.113 eV         | 1.730 eV | 1.131 eV | 1.765 eV          | 1.166 eV | 1.045 eV | 1.062 eV          | 0.821 eV | 0.897 eV |
